# Supplementary material
Source: Elsevier journal article supplement (https://www.sciencedirect.com/science/article/pii/S2254887419301109)
Supplement: mmc1 [file S2254887419301109:mmc1.pdf]

## Anexo I. Cuestionario *ad hoc* sobre la percepción del médico acerca de la satisfacción del paciente con el tratamiento anticoagulante.

1.- ¿Considera que el paciente está satisfecho con los controles que debe realizar con su tratamiento anticoagulante?

|   |   |   |   |   |   |   |   |   |   |    |
|---|---|---|---|---|---|---|---|---|---|----|
| 0 | 1 | 2 | 3 | 4 | 5 | 6 | 7 | 8 | 9 | 10 |
|---|---|---|---|---|---|---|---|---|---|----|

Totalmente insatisfecho Totalmente satisfecho

2.- ¿Considera que el paciente está satisfecho ante las posibles interacciones de su tratamiento anticoagulante con la dieta?

|   |   |   |   |   |   |   |   |   |   |    |
|---|---|---|---|---|---|---|---|---|---|----|
| 0 | 1 | 2 | 3 | 4 | 5 | 6 | 7 | 8 | 9 | 10 |
|---|---|---|---|---|---|---|---|---|---|----|

Totalmente insatisfecho Totalmente satisfecho

3.- ¿Considera que el paciente está satisfecho ante las posibles interacciones de su tratamiento anticoagulante con otros fármacos?

|   |   |   |   |   |   |   |   |   |   |    |
|---|---|---|---|---|---|---|---|---|---|----|
| 0 | 1 | 2 | 3 | 4 | 5 | 6 | 7 | 8 | 9 | 10 |
|---|---|---|---|---|---|---|---|---|---|----|

Totalmente insatisfecho Totalmente satisfecho

4.- ¿Considera que el paciente está satisfecho con la eficacia de su tratamiento anticoagulante?

|   |   |   |   |   |   |   |   |   |   |    |
|---|---|---|---|---|---|---|---|---|---|----|
| 0 | 1 | 2 | 3 | 4 | 5 | 6 | 7 | 8 | 9 | 10 |
|---|---|---|---|---|---|---|---|---|---|----|

Totalmente insatisfecho Totalmente satisfecho

5.- ¿Considera que el paciente está satisfecho con la seguridad de su tratamiento anticoagulante?

|   |   |   |   |   |   |   |   |   |   |    |
|---|---|---|---|---|---|---|---|---|---|----|
| 0 | 1 | 2 | 3 | 4 | 5 | 6 | 7 | 8 | 9 | 10 |
|---|---|---|---|---|---|---|---|---|---|----|

Totalmente insatisfecho Totalmente satisfecho

6.- Considera que el paciente está, en general, satisfecho con su tratamiento anticoagulante?

|   |   |   |   |   |   |   |   |   |   |    |
|---|---|---|---|---|---|---|---|---|---|----|
| 0 | 1 | 2 | 3 | 4 | 5 | 6 | 7 | 8 | 9 | 10 |
|---|---|---|---|---|---|---|---|---|---|----|

Totalmente insatisfecho Totalmente satisfecho
